# Supplementary material
Source: Royal Society of Chemistry journal article supplement (doi:10.1039/d6ta02200f)
Supplement: d6ta02200f1.pdf [file d6ta02200f1.pdf]

## Supplementary Information

### Hybrid carbonate and redox system for thermochemical energy storage

Mónica Salazar-Lago<sup>a, †</sup>, Ana Castro-Chincho<sup>a</sup>, Pedro E. Sánchez-Jiménez<sup>a,\*</sup>, Luis A. Pérez-Maqueda<sup>a,\*</sup>, Antonio Perejón<sup>a,b,\*</sup>

<sup>a</sup>Instituto de Ciencia de Materiales de Sevilla (C.S.I.C.-Universidad de Sevilla). C. Américo Vespucio 49, 41092, Sevilla, Spain.

<sup>b</sup>Departamento de Química Inorgánica, Facultad de Química, Universidad de Sevilla, 41012 Sevilla, Spain

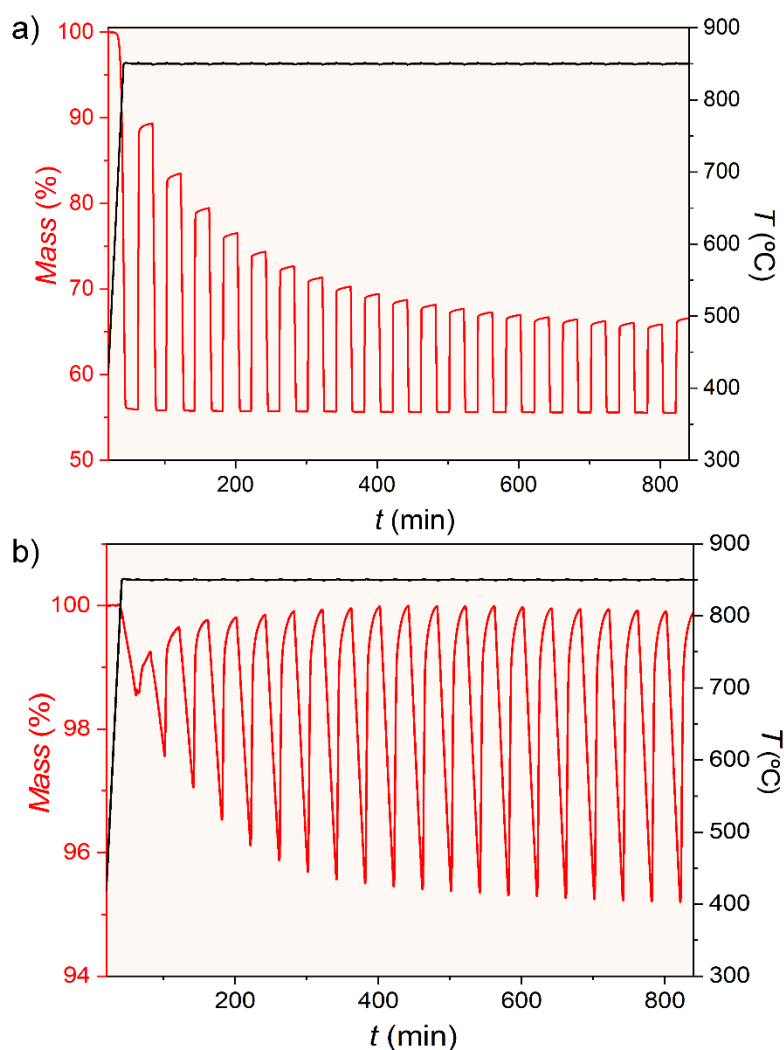

Figure S1. Time evolution of the mass percentages (red lines) and temperature (black lines) for (a)  $\text{CaCO}_3$  and (b)  $\text{CuO}$  tested under Charge– $\text{N}_2$ /Discharge– $\text{CO}_2$ – $\text{O}_2$  conditions.

<sup>†</sup> **Present address:** Thermal Spray Group, Industry and Transport Division, TECNALIA, C/ Gabiria 82-84, 20305 Irun, Spain; Departamento de Química Aplicada, Facultad de Química, Universidad del País Vasco/Euskal Herriko Unibertsitatea (UPV/EHU), 20018 Donostia-San Sebastián, Spain

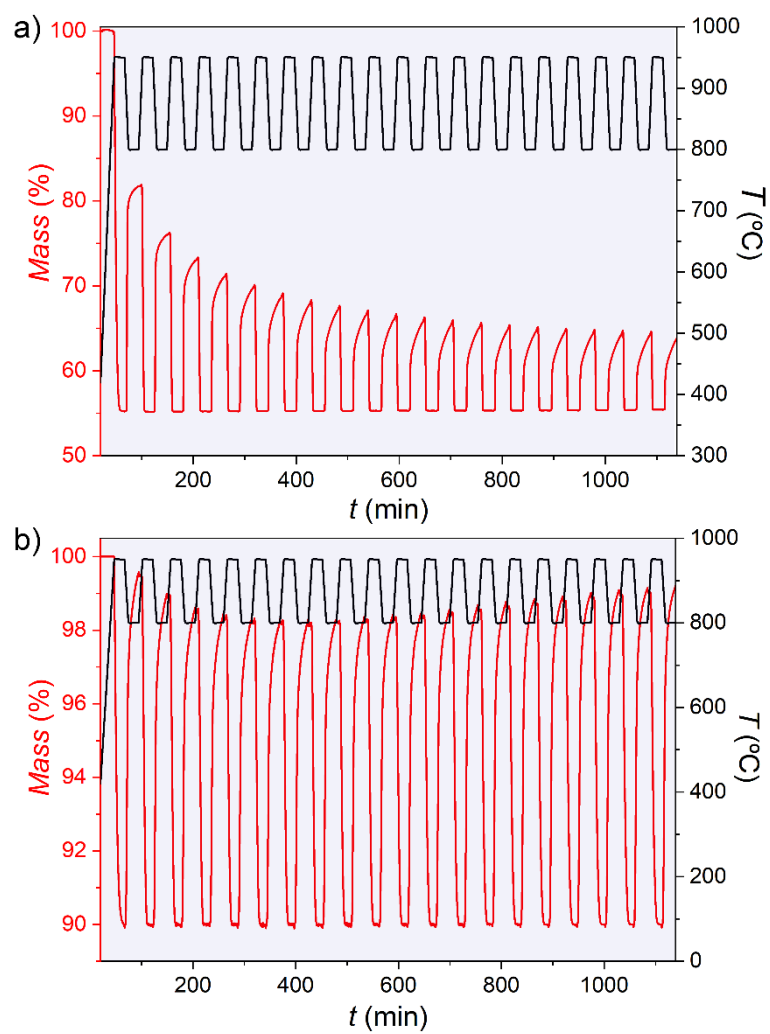

Figure S2. Time evolution of the mass percentages (red lines) and temperature (black lines) for (a)  $\text{CaCO}_3$  and (b)  $\text{CuO}$  tested under Charge/Discharge- $\text{CO}_2$ - $\text{O}_2$  conditions.
